1  
2  
3  
4  
5  
6  
7  
8  
9  
10  
11  
12  
13  
14  
15  
16  
17  
18  
19  
20  
21  
22

## **A cross-sectional study to evaluate access to antenatal care services in Twifo**

### **Hemang Lower Denkyira district of Ghana**

John Hammond <sup>1,2</sup> <sup>¶</sup>\*, Silas Adjei-Gyamfi <sup>3</sup> <sup>¶</sup>, Doreen Brew Daniels <sup>4</sup>, Godfred Kwabena Sarpong <sup>2</sup>  
&, Hirotsugu Aiga <sup>1</sup> &, Tsunenori Aoki <sup>1</sup> <sup>¶</sup>

<sup>1</sup> School of Tropical Medicine and Global Health, Nagasaki University, Nagasaki, Japan.

<sup>2</sup> Central Regional Health Directorate, Ghana Health Service, Cape Coast, Central Region, Ghana.

<sup>3</sup> Savelugu Municipal Hospital, Ghana Health Service, Savelugu, Northern Region, Ghana.

<sup>4</sup> Elmina Polyclinic, Ghana Health Service, Elmina, Central Region, Ghana.

**\* Corresponding author**

Email: [john.hammond@ghs.gov.gh](mailto:john.hammond@ghs.gov.gh)

**Short title**

Factors influencing access to antenatal care in Ghana

23  
24  
25  
26  
27  
28  
29  
30  
31  
32  
33  
34  
35  
36  
37  
38  
39  
40  
41  
42

## Abstract

**Background:** Antenatal care (ANC) which is an essential component of the reproductive, maternal, newborn, and child health continuum of care is found to positively correlate with supervised delivery and the reduction of maternal deaths. In Ghana, few studies have explored how ANC is influenced by the community-based health planning and services (CHPS) policy, and in the Central Region, evidence is non-existent. This study aimed to determine factors that influence access to ANC services provided through the CHPS policy in the Twifo Hemang Lower Denkyira district in the Central Region of Ghana.

**Methods:** A cross-sectional study examined 310 women aged 15-49 years, having children less than 12 months, and interviewed using a structured questionnaire. Univariate and multivariate logistic regression analyses were conducted using STATA 17 and results were reported as odds ratios at a confidence level of 95%.

**Results:** ANC coverage and proportion of early ANC initiation were 93.9% and 69.1% respectively. Being unmarried (AOR=0.125, 95%CI=0.012,0.926), and home delivery (AOR=0.013; 95%CI: 0.001,0.176) were associated with decreased odds of at least one ANC visit during pregnancy. Larger ( $\geq 11$ ) household size (AOR=3.848; 95%CI=1.914,16.21), lesser (<4) ANC contacts (AOR=6.332; 95%CI=2.049,19.57), and home visitation by CHPS staff (AOR=1.813;

43 95%CI=1.014,3.243) were associated with higher odds of late ANC initiation while average  
44 monthly income (AOR=0.123; 95%CI=0.024,0.630) was associated with reduced odds of late  
45 ANC initiation. Interestingly, knowledge about ANC and pregnancy, and geographical variables  
46 like receiving ANC services from CHPS zones, and distance to CHPS zones were not statistically  
47 significant with either ANC attendance or time of ANC initiation after controlling for the effect  
48 of other variables.

49

50 **Conclusion:** Though ANC and early ANC initiation coverages were relatively high, the  
51 complexities in the given correlates of ANC accessibility require a multi-sectoral approach to  
52 strengthen community-based services to increase the survival of pregnant women and unborn  
53 babies.

54

55

56

57

58

59

60

61

62

63

64

65

66

67

68

## **Keywords**

69

ANC attendance,

70

ANC initiation,

71

Antenatal care,

72

Community-based Health Planning and Services,

73

Pregnant women,

74

Southern Ghana.

75

76

77

78

## **Number of words**

79

Abstract      298 words

80

Main text      4,724 words

81

82

83

84

85

86

87

88

89

## Introduction

90 The International human rights law recognizes the right of women and adolescent girls to  
91 survive pregnancy and childbirth through the provision of appropriate sexual and reproductive  
92 health services (1). According to the World Health Organization (WHO), access to adequate  
93 healthcare must be provided with sufficient and appropriate content (2). However, globally, over  
94 400 million people lack access to primary care (3), including pregnant women.

95 Antenatal care (ANC), which is the care provided by skilled healthcare providers to women  
96 during pregnancy for positive birth outcomes, forms an essential part of the reproductive,  
97 maternal, newborn, and child health (RMNCH) continuum of care. ANC has become a global  
98 priority over the past decade intending to increase its coverage (4); as such, between 2015 and  
99 2020, about 87% of pregnant women had at least one ANC visit with a skilled care provider  
100 globally (5). Also, in sub-Sahara Africa (SSA), the proportion of women who had at least one  
101 ANC visit during pregnancy has improved from 69% in 2006 (6) to 78.5% in 2021 (7). RMNCH  
102 services like ANC does not only reduce maternal and child mortalities (8,9) but also prevent  
103 adverse birth outcomes like low birthweight and preterm births (10,11), especially in poorly  
104 resourced countries (12). Early identification of high-risk pregnancies through ANC leading to  
105 complications like severe bleeding, infections, pre-eclampsia/eclampsia, unsafe abortions,  
106 which contribute to nearly 80% of all maternal deaths, and the provision of appropriate care by

107 skilled health personnel at all levels of the continuum of care has been proven to be the best  
108 preventive system to save lives of women and children (9,13–15).

109 The challenges women face in accessing skilled care while pregnant through to delivery in poor  
110 areas have been reported as a significant contributor to maternal deaths (16). While 17% of  
111 global births occurred in SSA, it contributed to the highest proportion (57%) of the 358,000  
112 deaths that occurred due to pregnancy and childbirth (17). Most studies have attributed ANC  
113 accessibility to factors including socio-culture, socio-economic, and socio-demographic (religion  
114 and rural/urban residence) factors among others, as predictors of timely and continuous ANC  
115 attendance (8,18,19). It, therefore, underscores the need for comprehensive and sustainable  
116 healthcare policies to address these gaps, creating inequities in access for women, especially  
117 those in rural communities (20).

118 Over the past two decades, Ghana has been implementing the community-based health  
119 planning and services (CHPS) policy, aiming to reduce access barriers to healthcare through the  
120 provision of primary health care (PHC) services at the community level. The primary strategy of  
121 the policy is the posting of a community health nurse/officer (CHN/O) in a clearly defined area  
122 with the support of the community leadership and support system to plan and mobilize  
123 resources to provide services (21,22). The initiative, which is the primary strategy for the  
124 provision of community-focused services, has contributed to a significant drop in maternal and  
125 child deaths and the increasing performance of ANC and vaccination services, particularly in  
126 rural areas (23). Despite its promising benefits in Ghana, 2.3% of women did not attend ANC  
127 before delivery (24), 22% of all deliveries were assisted by unskilled personnel (25), and only

128 9.9% of births occurred within 8 km of CHPS zones (26), and this could partly explain why Ghana  
129 did not meet the Millenium Development Goal’s target on maternal and infant health.

130 In the Central Region of Ghana, CHPS facilities which serve 52% of rural populations in the  
131 region, contribute to about 16% of all ANC registrants and 8% of skilled deliveries (27). The  
132 Twifo Hemang Lower Denkyira (THLD) district is one of the rural districts with poor maternal  
133 health indicators despite the increased investment in scaling up PHC services closer to the  
134 doorsteps of many more households and communities. In 2020, ANC coverage and first-  
135 trimester ANC registrants were 56.4% and 57.7% respectively, with only 32.5% of pregnant  
136 women having access to skilled delivery care (27), indicating a gap between ANC and skilled  
137 delivery, as seen in most SSA countries. There is a need to understand how pregnant women in  
138 rural settings interact with the healthcare system and what influences their access to ANC in the  
139 context of CHPS. Considering several pieces of evidence that make CHPS a very promising policy  
140 for the improvement of services, particularly for women, access to healthcare in the district  
141 remains poor. Only a few studies have examined the access to ANC services provided through  
142 the CHPS strategy for women in the region and its impact on achieving quality maternal and  
143 child healthcare. This study therefore aimed to explore factors that influence women’s access to  
144 ANC services provided through the CHPS strategy in the THLD district of the Central Region of  
145 Ghana.

146

147

148

149

150

151

## Materials and Methods

152 **Study setting**

153 The study was conducted at THLD district which is one of the districts among the 22 districts in  
154 the Central region of Ghana, with its administrative capital at Twifo Hemang. It stretches for  
155 about 75km from the regional capital, Cape Coast, and lies between latitudes 5° 50' N and  
156 longitude 1° 50' W, located in the north-western part of the region with a total landmass of 674  
157 sq. km ([Figure 1](#)). The estimated population in 2020 was 67,341, of which 51% are females, with  
158 an estimated 4% (2,694) expected to be pregnant and a population density of about 82 per  
159 square kilometer ([28](#)). Whereas the number of women of reproductive age in 2020 was 16,073,  
160 the total ANC and postnatal visits were 7,502 and 1,324 respectively. THLD district is  
161 predominantly rural (86%) with 300 settlements and 84 clearly defined communities. Most of  
162 the remaining settlements are farmsteads, usually with a population below 500 people. The  
163 health delivery system in the district is made up of the orthodox and traditional systems, with  
164 the latter consisting of traditional birth attendants, herbalists, fetish priests, and spiritualists,  
165 and is thought to play a crucial role in the health-seeking behavior of most people in the district.  
166 Health delivery under the orthodox system in the district exists up to two levels (A and B) under  
167 the country's PHC system, that is, the community and sub-district levels. It is divided into four



168 sub-districts with no district hospital but has three health centres, one community clinic, and 13  
169 functional CHPS zones (27) as shown in Figure 1.

170

171 Fig 1. Map of the THLD district showing communities and measured distance to all CHPS zones

172

### 173 **Study design and population**

174 To assess access to ANC services in the THLD district of the Central Region under CHPS policy, a  
175 descriptive cross-sectional quantitative study was used. This study targeted women of  
176 reproductive age (15-49 years) having at least one child aged 12 months or younger preceding  
177 data collection, living or residing within communities of all the demarcated CHPS zones of the  
178 district.

### 179 **Sample size**

180 The sample size ( $N_0$ ) was determined using Cochran's (1977) formula;  $N_0 = \frac{[(Z\alpha/2)^2(1-p)p]}{d^2}$ .  
181 Where " $N_0$ " is the estimated sample size, " $Z\alpha$ " is the confidence level at 95% (standard value of  
182 1.96), " $p$ " is the estimated proportion of women accessing maternal healthcare services in CHPS  
183 zones in Ghana (76%) (18), and " $d$ " is the level of precision/margin of error of 0.05. Hence,  $N_0 =$   
184  $\frac{[(1.96)^2 \times (1 - 0.76) \times 0.76]}{(0.05)^2} = 280.3 \sim 280$ . With a minimum sample of 280, a non-  
185 response rate of 10% was added to attain an estimated final sample size of 310.

### 186 **Recruitment method**

187 During sampling, all 13 CHPS zones in the THLD district were selected for the study. Probability  
188 proportional to size technique was used to determine the sample sizes for each CHPS zone.

189 Using the vaccination records in the child welfare clinic register in each CHPS zone as the  
190 sampling frame (29), a total of 1751 eligible participants (children born under 12 months) were  
191 obtained. Thereafter, a simple random sampling method was used to select the required sample  
192 size of 310 from the CHPS zones and the selected children were directly linked to their mothers  
193 and sorted according to the community of residence. In total, 48 communities were obtained  
194 and the addresses (including telephone numbers) of the mothers were taken for identification  
195 at the community level. Within the community, research assistants were supported by the  
196 CHN/Os and the community volunteers to trace the mother-child dyads. The respondents were  
197 interviewed in their place of residence after booking an appointment with them and signing an  
198 informed consent/assent form. In the absence of a study respondent at the time of the visit, the  
199 research assistant rescheduled the interview to a later time.

## 200 **Data collection**

201 The data collection was conducted by five trained research assistants from 15<sup>th</sup> February to 15<sup>th</sup>  
202 March 2022. Data was collected using a pretested standardized questionnaire with the aid of  
203 mobile data collection software (Open Data Kit Collect-version 2021.2.4). The information on  
204 socio-demographic, socioeconomic (household assets), antenatal, and CHPS location/distance  
205 characteristics as well as respondents' knowledge of ANC and pregnancy were collected through  
206 face-to-face interviews with participants using the local dialect (Fantse and Twi). Other relevant  
207 information on ANC services was confirmed from maternal and child health record books.  
208 Before each session of the interview, global positioning system (GPS) coordinates were obtained

209 from respondents which were used to estimate distances from the respondent's place of  
210 residence to the nearest CHPS zone.

### 211 **Measurement of study variables**

212 A description of the key variables that were collected by the research assistants is shown in  
213 [Table 1](#). The outcome variables in the study were At least one ANC attendance and late ANC  
214 initiation. Whereas the exposure variables included all maternal background (sociodemographic,  
215 socioeconomic, and antenatal variables) and CHPS location/distance characteristics.

### 216 **Data analysis**

217 Data analysis was conducted using STATA version 17 (Stata Corporation, Texas, USA) at a  
218 significance of  $p < 0.05$ . Simple descriptive statistics were performed on categorical variables and  
219 summarized into frequency distributions and percentages. Means and standard deviations were  
220 calculated for continuous variables and were further categorized based on the existing literature.  
221 ANC attendance was coded as "0" for "No ANC attendance" and "1" for "At least one ANC  
222 attendance"; while the timing of ANC initiation was also coded as "0" for "Early ANC initiation"  
223 and "1" for "Late ANC initiation". Socioeconomic characteristics were measured with principal  
224 component analysis to construct household wealth terciles (poor, middle, and rich) using  
225 household assets owned by respondents (30). Knowledge was assessed using composite scores  
226 of responses about ANC and pregnancy, with each correct answer given "1" mark and "0" for a  
227 wrong answer. A median score was generated from the total scores, and participants who  
228 scored equal to or above the median score were classified as having adequate knowledge, and  
229 those below the median score were classified as having inadequate knowledge (10,29,31). All  
230 GPS coordinates collected from participants were processed using QGIS software for analysis

231 through the Euclidean technique to establish distance from the respondent's place of residence  
232 to the CHPS zones (32,33).

233 Bivariate analyses (Chi-square/Fisher's exact test) were used to explore the association between  
234 outcome variables and all background (exposure) variables. Simple logistic regression analyses  
235 were further conducted to confirm the bivariate associations. Based on previous studies,  
236 significant predictor variables in the bivariate association that are plausible and relevant in  
237 explaining the outcome variables were forwarded into the multivariate logistic regression model  
238 after controlling for multicollinearity. During multicollinearity testing via variance inflation factor  
239 (VIF), the variables with a VIF less than 5 were chosen for the final logistic analyses (11).  
240 Multivariate logistic regression was used to identify factors for at least one ANC attendance or  
241 late ANC initiation and the analysis results were reported as odds ratios with its corresponding  
242 95% confidence interval.

#### 243 **Ethical declarations**

244 Ethical approval was sought from the Nagasaki University Ethics Review Committee and Ghana  
245 Health Service Ethics Review Committee with protocol approval numbers  
246 NU\_TMGH\_2021\_195\_1 and GHS-ERC: 023/01/22, respectively. Additionally, written permission  
247 was obtained from the Central Regional and THLD District Health Directorates. Opinion leaders  
248 in the selected communities were informed about the presence of the research team. Only  
249 participants who agreed to participate in the study were made to sign the written informed  
250 consent after explaining the content to them in the presence of their witnesses. Also, written  
251 informed assent was signed by parents/guardians/legal representatives of participants (minors)  
252 who are less than 18 years old.

253

254

255

256

257

## Results

### 258 Sociodemographic characteristics of respondents

259 Of the 310 recruited mother-child dyads who fully responded to the study, 24.2% were between  
260 the ages of 30-34 years, with a mean( $\pm$ sd) age of 27.6( $\pm$ 6.9) years. Most of the respondents  
261 were married (78.1%), were engaged in some form of occupation (80.6%), belonged to the  
262 Christian religion (95.5%) and Fantse ethnic group (47.4%), and had a parity of 2 to 4 births  
263 (46.1%). A greater proportion of these respondents (87.1%) and their partners (86.1%) attained  
264 some form of formal education with secondary/higher as their highest educational level. More  
265 than half of the respondents had a household size between 6-10 people (52.9%) while slightly  
266 above one-third (35.5%) of them had their youngest child between the ages of 9 to 12 months  
267 ([Table 2](#)).

268

### 269 Socioeconomic and antenatal characteristics of respondents

270 Most of the respondents were enrolled in the national health insurance scheme (91.6%) and  
271 had a higher knowledge level about ANC and pregnancy (96.5%) while 42.3% of them were  
272 classified as poor based on their household wealth index. Despite the free maternal healthcare

273 policy in Ghana, all the women claimed they paid some money for receiving ANC services from  
274 the health facilities with 26.5% of them paying between Ghc 1.0–5.0 (USD 0.1–0.5).  
275 ANC coverage was nearly universal (93.9%) with most of them accessing ANC service from the  
276 CHPS zones (71.8%). In addition, 69.1% of the women initiated ANC services at an early stage of  
277 pregnancy (thus within the first trimester) while 12.6% of them made less than four visits before  
278 delivery. The decision to attend ANC was mainly made by most women themselves (77.4%) and  
279 almost one-third of the women were escorted by their partners (32.0%). Although 34.8% of the  
280 respondents received home visits from CHPS zone staff, the prevalence of home delivery was  
281 19.7% ([Table 3](#)).

282

### 283 **Distance and location of CHPS zones**

284 [Table 3](#) describes the distance and location of CHPS zones (health facilities) for ANC services.  
285 More than half (52.6%) of the respondents resided in communities without health facilities, and  
286 80.7% reported that the CHPS compound is the nearest health facility to them. However, 15.5%  
287 of the nearest CHPS zones were uncompleted functional zones. About 81.6% of the women  
288 travel for less than 30 minutes before getting to the nearest CHPS zones, with walking (46.5%)  
289 and use of commercial motorbikes (34.8%) as the primary mode of transport. Also, 90.3% of the  
290 women spent between GHc 1.0–10.0 (USD 0.1–1.1) to and from the nearest health facility per  
291 ANC visit on roads described by most as feeder/dusty (56.1%). The distance measured from the  
292 place of the residence revealed that about 80.7% of the women traveled less than five  
293 kilometers to the nearest functional CHPS zone ([Figure 1](#)).

294

295 **Bivariate association of antenatal accessibility with background variables**

296 As displayed in [Tables 1, 2, and 3](#), marital status ( $p=0.028$ ), mother's educational level ( $p=0.003$ ),  
297 partner's educational level ( $p=0.043$ ), mother's health insurance status ( $p=0.040$ ), household  
298 wealth index ( $p=0.003$ ), knowledge about ANC and pregnancy ( $p<0.001$ ), place of delivery  
299 ( $p<0.001$ ), receiving home visit from CHPS zone staff ( $p=0.007$ ), health facility in the community  
300 ( $p<0.001$ ), CHPS zone functionality status ( $p=0.008$ ), and distance to nearest functional CHPS  
301 zones ( $p=0.046$ ) exhibited bivariate correlation with at least one ANC attendance. On one hand,  
302 household (family) size ( $p=0.030$ ), mother's average monthly income ( $p=0.017$ ), household  
303 wealth index ( $p=0.029$ ), frequency of ANC visits ( $p<0.001$ ), receiving home visit(s) from CHPS  
304 zone staff ( $p=0.049$ ), CHPS zone functionality status ( $p=0.002$ ), distance to nearest functional  
305 CHPS zones ( $p=0.012$ ) were significantly associated with late ANC initiation at the bivariate level.

306

307 **Multivariate analysis on associated factors for antenatal accessibility**

308 After registering no multicollinearity issues among the eleven and seven predictor variables that  
309 showed significant bivariate association with at least one ANC attendance and late ANC  
310 initiation respectively, two (marital status, place of delivery) and four (household size, mother's  
311 average monthly income, frequency of ANC visits, receiving home visit from CHPS zone staff)  
312 predictor variables respectively remained statistically significant at the multivariate analysis  
313 level ([Table 4](#)).

314 The findings revealed that unmarried women were 98.7% ( $=[1-0.013] \times 100$ ) less likely to attend  
315 ANC services compared to married ones (AOR=0.013; 95%CI=0.001,0.176;  $p=0.001$ ). Women

316 who delivered at home had lower odds of attending ANC during pregnancy than those who  
317 delivered in a health facility (AOR=0.125; 95%CI=0.012,0.926; p=0.047).

318 On the other hand, women with a larger household size of more than 11 people were 3.848  
319 times more likely to initiate late ANC services than their counterparts (AOR=3.848;  
320 95%CI=1.914,16.21; p=0.046). The likelihood of a pregnant woman who made less than four  
321 ANC visits to initiate late ANC services is 6.332 times higher than those who made at least four  
322 ANC visits during pregnancy (AOR=6.332; 95%CI=2.049,19.57; p=0.001). Additionally, pregnant  
323 women who received home visits by CHPS staff had 1.813 times increased odds of late ANC  
324 initiation compared to those who did not receive home visit sessions (AOR=1.813;  
325 95%CI=1.014,3.243; p=0.045). Finally, compared to women who had no income, those whose  
326 average monthly income ranged between GHc 500–1000 (USD 56–111) were 87.7% (= [1–  
327 0.123]x100) less likely to initiate ANC services in the second or third trimester of pregnancy  
328 (AOR 0.123, 95%CI=0.024,0.630; p=0.012).

329

330

331

332

333

334

335

336

337



338

339

340

341

342

343

344

345

346

347

348

## Discussion

349 The study examined factors that influence access to ANC services in rural communities within

350 the THLD district of the Central Region of Ghana in the context of CHPS policy implementation.

351 Findings from the study showed that 93.9% of the respondents had at least one ANC service

352 from a skilled provider, with 69.1% initiating their first visit within the first trimester of

353 pregnancy. This is higher than the regional ANC coverage and proportion of first-trimester visits

354 of 81% and 53% respectively (27) but agrees with the general high coverage in Ghana as

355 reported by several studies (24,34). In contrast, other studies in Ghana (35) and Rwanda (36)

356 reported only 43.1% and 25% of early ANC initiation respectively. In our study, 93% of the

357 women also made four or more ANC visits before delivery which is higher than the Ghana

358 national average of 89% (24) and rates in other developing countries (29,37,38). This is an

359 indication of how the interest of Ghanaian women has developed in the benefits of attending

360 ANC, which could be attributed to the heightened efforts to expand health facility coverage to  
361 improve access to healthcare, especially in bringing quality healthcare services close to the  
362 people (39).

363 Marital status offered significant protection for ANC attendance, as unmarried women had  
364 reduced odds of making at least one ANC visit. This finding is consistent with many other studies  
365 conducted in Ghana (8,31,40,41), and Kenya (38), but contradicts the study results from  
366 Ethiopia (42,43). The possible reason for this finding could be attributed to society's values on  
367 marriage and pregnancy. For instance, in most rural Ghanaian communities, unmarried women  
368 are not to engage in sexual acts (8). In a situation when pregnancy occurs, most of these women  
369 tend to hide their pregnancies until it is obvious to avoid being stigmatized and ostracized by  
370 society, which could contribute to reducing their ANC contacts or failing to attend ANC at all  
371 (31,38,44,45). On the other hand, married women are seen to have a higher possibility of  
372 receiving support from their partners (husbands) during pregnancy (8) which increases their  
373 chances of higher ANC visits.

374 The place of delivery had a significant influence on ANC attendance, as women who delivered at  
375 home were less likely to make at least one ANC visit. This study's results agree with similar  
376 studies conducted in most developing countries (35,46,47). In Ghana, there is increased  
377 awareness creation (via health education, and counseling) on services for pregnant women, free  
378 maternal healthcare under the NHIS, as well as the expansion of CHPS, which is helping to  
379 bridge the access gap for vulnerable populations (8,48). Notwithstanding, the perceived  
380 mistreatment of pregnant women by healthcare providers (49,50) could be responsible for the

381 home deliveries and low ANC visits. It is also worth noting that, despite the availability of at  
382 least one midwife to offer skilled care for pregnant women in almost all the CHPS zones in the  
383 district, most women are demotivated to visit ANC for service due to some cultural and  
384 personal beliefs (27).

385 Household size of more than 11 people was a significant correlate of late ANC initiation. In  
386 congruence with similar studies across the globe (51–54), having a larger household size is a  
387 strong predictor of late ANC initiation. Our study results contradict findings in Ethiopia (55) and  
388 Northern Ghana (45) which concluded that women with 4–9 living children were 3.5 times more  
389 likely to initiate ANC early. Household sizes in rural communities are mostly larger than those in  
390 urban communities (24), as more than half of our study respondents (57.1%) had a household  
391 size of 6 or more people. In the Ghanaian context, there are numerous societal responsibilities  
392 and pressures conferred on women with larger household sizes, as these women serve as the  
393 gatekeepers and managers of rural homes (8). This can affect the time and resources the  
394 pregnant woman may require to start and sustain ANC and, in most cases, prioritize their  
395 farming or trading activities to provide for their families. Also, in some instances, those women  
396 who have experienced successful pregnancies may develop some level of confidence that they  
397 can survive the early period of pregnancy without any skilled assistance leading to late initiation  
398 (45,54,56).

399 Women who made less than four ANC visits were more likely to initiate their first ANC after the  
400 first trimester of pregnancy which is consistent with some study findings (57,58). Evidence has  
401 shown that women who initiate early ANC have higher odds of receiving four or eight ANC

402 contacts than those with late ANC initiation (7,45,59). Higher ANC contacts and/or early ANC  
403 initiation is essential as it ensures that pregnant women get all the required content and higher  
404 quality ANC services at the right time (14,58). Most women in rural communities have  
405 unplanned pregnancies and may not be aware of being pregnant until they feel unwell before  
406 visiting the health facility, which is usually late. Furthermore, other sociocultural and religious  
407 beliefs and misconceptions surrounding pregnancy within the Ghanaian communities  
408 potentially discourage the use of orthodox healthcare services (60,61) which may lead to late or  
409 no ANC visits. Reportedly, low economic status, perception of no problem with pregnancy, and  
410 misinterpretation of recommendations from healthcare providers (45,62,63) could ignite late  
411 ANC initiation leading to non-achievement of the recommended number of visits before  
412 delivery.

413 Home visit by health staff was independently associated with the time of ANC initiation. Home  
414 visits form a significant part of the daily activities of health staff in CHPS zones. This house-to-  
415 house visitation enables individuals and households to receive appropriate information and care  
416 at their doorstep throughout the RMNCH continuum of care (22,64). Our study revealed that  
417 pregnant women were found to have higher odds of attending ANC late if they received a home  
418 visitation from health staff from the CHPS zone. This finding is comparable with a randomized  
419 control trial in Nigeria (65) but contradicts the results of a similar study by Kumbeni and his  
420 colleagues in the Upper East region of Ghana (40) which reported that women who received at  
421 least one home visit had higher odds of initiating early ANC and achieving at least eight ANC  
422 visits. The plausible reason for this finding may be due to the trust built between the pregnant  
423 woman and the healthcare professionals through home visit sessions (40,48). These women

424 misunderstand the services they received during the home visitation as the same as the facility  
425 care. Consequently, they become self-satisfied and do not find it appropriate to go to the health  
426 facility, especially when they feel nothing is wrong with them (45).

427 Monthly income offered significant protection for ANC initiation, as women with an average  
428 income between GHc 500–1000 had reduced odds of initiating late ANC services. This finding  
429 agrees with most studies in the SSA (51,52,66), which established a substantive relationship  
430 between women's income level and initiation of ANC. High monthly wage offers these women  
431 enormous leverage to overcome late visitation (67,68). Most Ghanaian women are unable to  
432 afford other indirect costs of accessing ANC (transportation, laboratory investigations, and other  
433 medications), despite the free maternal healthcare under the NHIS, making women who earn  
434 more income better placed to afford these services (66,69), and avail themselves for early ANC  
435 services. Nearly 77% of the study's respondents were found to be self-employed, with most  
436 (39.4%) being farmers. Thus, their income is not regular and often not even close to the  
437 Ghanaian minimum wage due to the unstable economic situation in Ghana. The apparent  
438 financial constraint forces these women to adopt options to reduce expenditure, including  
439 delaying ANC initiation (70). This gives credence to the importance of pro-poor policies that can  
440 augment the financial situation of these women and ultimately assist them in making  
441 appropriate reproductive health decisions.

442

443 **Strengths and limitations of the study**

444 This is one of the few studies in Ghana that examined access to ANC by pregnant women in  
445 rural communities in the context of CHPS; thus, the findings provide valuable insights for policy  
446 strengthening. Moreover, the methodology used allowed for the gathering of primary data,  
447 which characterizes the uniqueness of the study setting. Restricting participants to only 12  
448 months post-partum mothers preceding data collection reduced possible recall bias.  
449 Nonetheless, the type of study design used may have limited the impact of the study due to the  
450 interpretation of the results as it could only allow for inferences but not causal relationships.  
451 Although there were efforts to limit information bias, the self-reporting used may have  
452 introduced recall and reporting biases. For instance, some mothers refused to disclose  
453 information on their monthly income, and others were not sure about their earnings.  
454 Additionally, since only mother-child dyads were used, information about mothers with adverse  
455 birth outcomes like perinatal deaths was not collected which might have affected study results.  
456 The use of the Euclidean distance to measure the distance of respondents to CHPS zones did  
457 not consider other topographical factors such as terrain. However, this method, though not  
458 sophisticated, has been an acceptable method for determining accessibility. Finally, only  
459 functional CHPS zones were used as the unit of measure, even though some of the respondents  
460 were closer to other types of health facilities which may have limited the data as further studies  
461 may be required to bridge that knowledge gap.

462

463

464

465

466

467

468

469

470

471

472

473

474

475

## Conclusion

476 ANC coverage and early ANC initiation rate in the district were found to be high. Being  
477 unmarried, and home delivery were associated with at least one ANC visit. Independent  
478 correlates of late ANC initiation included larger household (family) size, fewer ANC contacts,  
479 home visitation by CHPS staff, and maternal average monthly income. Although a greater  
480 proportion of respondents received ANC services from CHPS zones, resided closer to CHPS

481 zones, and had adequate knowledge about ANC and pregnancy, these expected plausible  
482 factors were not statistically associated with ANC attendance and time of ANC initiation.

483 The interaction of these given factors requires a multi-sectoral approach to mitigate them. The  
484 Government of Ghana through its relevant agencies including Ghana Health Service (GHS),  
485 should intensify the implementation of pro-poor policies such as Livelihood Empowerment  
486 Against Poverty (LEAP) which provides financial support for the poor, free maternal healthcare  
487 services, fertilizer subsidy for farmers, free education with more emphasis on girl education,  
488 among others, so that the livelihood of these vulnerable women in rural communities could be  
489 improved.

490 Additionally, the Ghana Ministry of Health (MoH) and stakeholders, including the Ministry of  
491 Education, Local Government Ministry, and other Non-Governmental Organizations should  
492 ensure more women in rural communities take advantage of the free education policy, thereby  
493 empowering them to make informed decisions on their reproductive rights.

494 The provision of accurate, appropriate, and timely information can potentially alter health-  
495 seeking behaviors in the district. Thus, the MoH and GHS should strengthen Behavior Change  
496 Communication strategies provided through health promotion and education. All possible  
497 avenues to share this information should be explored, including the use of community health  
498 management committees, community health volunteers, schools, community support groups,  
499 and community opinion leaders.



500 The MoH and GHS should also strengthen policies on home visits, including resourcing health  
501 facilities appropriately to gain the needed positive results. The content should be re-examined  
502 with a more innovative approach to providing the service and appropriate follow-up where  
503 necessary. Further qualitative studies need to be conducted to provide more insights into how  
504 these factors affect access to ANC and its impact on the individuals, households, and  
505 communities in the THLD district.

506

507

508

509

510

511

512

513

514

515

516

### **Acknowledgments**

517 The authors are very thankful to The Project for Human Resource Development Scholarship -  
518 Japan International Cooperation Agency (JICA); Nagasaki University School of Tropical Medicine  
519 and Global Health – Japan; and Central Regional Health Directorate, Ghana Health Service –

520 Ghana, for supporting this study. Our gratitude also goes to all data collectors, research  
521 respondents, and volunteers who greatly contributed to this study.

522

523

524

525

526

527

528

529

530

531

532

533

534

535

536

537

538

## References

- 539 1. Office of the United Nations High Commissioner for Human Rights (OHCHR). Technical  
540 guidance on the application of a human rights-based approach to the implementation of  
541 policies and programmes to reduce preventable maternal morbidity and mortality.

- 542 Human Rights Council, twentieth session. New York (NY); 2012.
- 543 [https://www2.ohchr.org/english/issues/women/docs/A.HRC.21.22\\_en.pdf](https://www2.ohchr.org/english/issues/women/docs/A.HRC.21.22_en.pdf)
- 544 2. World Health Organization (WHO). Alma-Ata Declaration [Internet]. Alma-Ata, USSR;
- 545 1978. Available from: [https://www.who.int/publications/almaata\\_declaration\\_en.pdf](https://www.who.int/publications/almaata_declaration_en.pdf)
- 546 3. World Health Organization (WHO), International Bank for Reconstruction and
- 547 Development (IBRD-IDA)/ The World Bank (WB). Tracking Universal Health Coverage:
- 548 2017 Global Monitoring Report. Geneva, Switzerland.; 2017.
- 549 [https://apps.who.int/iris/bitstream/handle/10665/259817/9789241513555-](https://apps.who.int/iris/bitstream/handle/10665/259817/9789241513555-eng.pdf?sequence=1)
- 550 [eng.pdf?sequence=1](https://apps.who.int/iris/bitstream/handle/10665/259817/9789241513555-eng.pdf?sequence=1)
- 551 4. Barbi L, Cham M, Ame-Bruce E, Lazzerini M. Socio-cultural factors influencing the
- 552 decision of women to seek care during pregnancy and delivery: A qualitative study in
- 553 South Tongu District, Ghana. *Glob Public Health*. 2021;16(4):532–45.
- 554 <https://doi.org/10.1080/17441692.2020.1839926>
- 555 5. UNICEF. Antenatal Care - UNICEF data. 2019. p. 1–7. Available from:
- 556 <https://data.unicef.org/topic/maternal-health/antenatal-care/>
- 557 6. The Partnership for Maternal Newborn and Child Health (PMNCH). Opportunities for
- 558 Africa’s Newborns: Practical data, policy and programmatic support for newborn care in
- 559 Africa [Internet]. The Partnership: for maternal, newborn and child health. 2006
- 560 <http://www.who.int/pmnch/media/publications/oanfullreport.pdf>
- 561 7. UNICEF. Antenatal Care Coverage. Data Warehouse - UNICEF DATA. 2022
- 562 [https://data.unicef.org/resources/data\\_explorer/unicef\\_f/?ag=UNICEF&df=GLOBAL\\_DAT](https://data.unicef.org/resources/data_explorer/unicef_f/?ag=UNICEF&df=GLOBAL_DAT)
- 563 [AFLOW&ver=1.0&dq=UNICEF\\_SSA.MNCH\\_ANC1.&startPeriod=2017&endPeriod=2022](https://data.unicef.org/resources/data_explorer/unicef_f/?ag=UNICEF&df=GLOBAL_DATAFLOW&ver=1.0&dq=UNICEF_SSA.MNCH_ANC1.&startPeriod=2017&endPeriod=2022)

- 564 8. Sakeah E, Okawa S, Oduro AR, Shibanuma A, Ansah E, Kikuchi K, et al. Determinants of  
565 attending antenatal care at least four times in rural Ghana: analysis of a cross-sectional  
566 survey. *Glob Health Action*. 2017;10(1).  
567 <https://doi.org/10.1080/16549716.2017.1291879>
- 568 9. World Health Organization (WHO). Maternal mortality Evidence brief Progress towards  
569 achieving the Sustainable Development Goals. 2019.
- 570 10. Adjei-Gyamfi S, Musah B, Asirifi A, Hammond J, Aryee PA, Miho S, et al. Maternal risk  
571 factors for low birthweight and macrosomia: a cross-sectional study in Northern Region,  
572 Ghana. *J Heal Popul Nutr*. 2023;42(1):1–16. <https://doi.org/10.1186/s41043-023-00431-0>
- 573 11. Adjei-Gyamfi S, Asirifi A, Aiga H. Prevalence and Associated Risk Factors of Preterm and  
574 Post-term Births in Northern Ghana: A Retrospective Study in Savelugu Municipality. *J*  
575 *Pediatr Perinatol Child Heal*. 2023;07(04):235–47.
- 576 12. World Health Organization (WHO). WHO recommendations on antenatal care for a  
577 positive pregnancy experience. Geneva, Switzerland; 2016. 1–172 p.  
578 [https://apps.who.int/iris/bitstream/handle/10665/250796/9789241549912-](https://apps.who.int/iris/bitstream/handle/10665/250796/9789241549912-eng.pdf?sequence=1)  
579 [eng.pdf?sequence=1](https://apps.who.int/iris/bitstream/handle/10665/250796/9789241549912-eng.pdf?sequence=1)
- 580 13. Say L, Chou D, Gemmill A, Tunçalp Ö, Moller AB, Daniels J, et al. Global causes of  
581 maternal death: A WHO systematic analysis. *Lancet Glob Heal*. 2014 Jun 1;2(6):323.  
582 Available from: [www.thelancet.com/](http://www.thelancet.com/)
- 583 14. Afulani PA. Rural/urban and socioeconomic differentials in quality of antenatal care in  
584 Ghana. *PLoS One*. 2015 Feb 19;10(2).
- 585 15. Banke-Thomas OE, Banke-Thomas AO, Ameh CA. Factors influencing utilisation of

- 586 maternal health services by adolescent mothers in Low-and middle-income countries: A  
587 systematic review. BMC Pregnancy Childbirth. 2017;17(1). Available from:  
588 <https://www.researchgate.net/>
- 589 16. De Jonge A, Minelli L, Jans S, Koku Awoonor-Williams J, Awingura Apanga P. Maternal  
590 Death in Rural Ghana: a Case study in the Upper east Region of Ghana. *Artic 101 Public*  
591 *Heal.* 2018;6:101. Available from: [www.frontiersin.org](http://www.frontiersin.org)
- 592 17. United Nations (UN). The Millennium Development Goals Report 2013 United Nations.  
593 New York; 2013. Available from: [https://www.un.org/millenniumgoals/pdf/report-](https://www.un.org/millenniumgoals/pdf/report-2013/mdg-report-2013-english.pdf)  
594 [2013/mdg-report-2013-english.pdf](https://www.un.org/millenniumgoals/pdf/report-2013/mdg-report-2013-english.pdf)
- 595 18. Braimah JA, Sano Y, Atuoye KN, Luginaah I. Access to primary health care among women:  
596 the role of Ghana's community-based health planning and services policy. *Prim Health*  
597 *Care Res Dev.* 2019 Jun 26;20(e82):e82. <https://doi.org/10.1017/S1463423619000185>
- 598 19. Novignon J, Ofori B, Tabiri KG, Pulok MH. Socioeconomic inequalities in maternal health  
599 care utilization in Ghana. *Int J Equity Health.* 2019;18(1):141.  
600 <https://doi.org/10.1186/s12939-019-1043-x>
- 601 20. World Health Organization (WHO). Health and Women; Today's Evidence, Tomorrow's  
602 Agenda. 2009. Available from:  
603 [https://apps.who.int/iris/bitstream/handle/10665/44168/9789241563857\\_eng.pdf?seq](https://apps.who.int/iris/bitstream/handle/10665/44168/9789241563857_eng.pdf?sequence=1)  
604 [uence=1](https://apps.who.int/iris/bitstream/handle/10665/44168/9789241563857_eng.pdf?sequence=1)
- 605 21. Ministry of Health (MoH) - Ghana. National Community Health Planning and Services  
606 (CHPS) Policy. Accra; 2014. Available from: [https://www.moh.gov.gh/wp-](https://www.moh.gov.gh/wp-content/uploads/2016/02/CHPS-policy-final-working-draft-for-validation.pdf)  
607 [content/uploads/2016/02/CHPS-policy-final-working-draft-for-validation.pdf](https://www.moh.gov.gh/wp-content/uploads/2016/02/CHPS-policy-final-working-draft-for-validation.pdf)

- 608 22. Ghana Health Services (GHS). Community-based Health Planning and Services (CHPS)  
609 Implementation Guidelines. Accra, Ghana; 2016. Available from:  
610 [https://www.moh.gov.gh/wp-content/uploads/2016/02/CHPS-policy-final-working-draft-](https://www.moh.gov.gh/wp-content/uploads/2016/02/CHPS-policy-final-working-draft-for-validation.pdf)  
611 [for-validation.pdf](https://www.moh.gov.gh/wp-content/uploads/2016/02/CHPS-policy-final-working-draft-for-validation.pdf)
- 612 23. Awoonor-Williams JK, Sory EK, Nyonor FK, Phillips JF, Wang C, Schmitt ML. Lessons  
613 learned from scaling up a community-based health program in the Upper East Region of  
614 northern Ghana. *Glob Heal Sci Pract.* 2013;1(1):117–33.
- 615 24. Ghana Statistical Service (GSS) Ghana Health Service (GHS) and ICF. Ghana Maternal  
616 Health Survey 2017. Vol. 6, GSS, GHS, and ICF. 2018. Available from:  
617 <https://dhsprogram.com/pubs/pdf/FR340/FR340.pdf>
- 618 25. World Health Organization (WHO). World Health Statistics 2019: Monitoring Health for  
619 the Sustainable Development Goals. CC BY-NC-S. Geneva, Switzerland; 2019. Available  
620 from: [https://apps.who.int/iris/bitstream/handle/10665/324835/9789241565707-](https://apps.who.int/iris/bitstream/handle/10665/324835/9789241565707-eng.pdf)  
621 [eng.pdf](https://apps.who.int/iris/bitstream/handle/10665/324835/9789241565707-eng.pdf)
- 622 26. Johnson FA, Frempong-Ainguah F, Matthews Z, Harfoot AJP, Nyarko P, Baschieri A, et al.  
623 Evaluating the impact of the community-based health planning and services initiative on  
624 uptake of skilled birth care in Ghana. *PLoS One.* 2015;10(3):1–18.
- 625 27. Ghana Health Service. DHIMS: District Information Management Systems version 2. 2021.
- 626 28. Ghana Statistical Service. Ghana 2021 Population and Housing Census: General Report.  
627 Accra, Ghana; 2021. Available from: <https://census2021.statsghana.gov.gh/>
- 628 29. Choulagai B, Onta S, Subedi N, Mehata S, Bhandari GP, Poudyal A, et al. Barriers to using  
629 skilled birth attendants' services in mid- and far-western Nepal: a cross-sectional study.

- 630 BMC Int Health Hum Rights. 2013 Dec 23;13(1). Available from:  
631 <https://pubmed.ncbi.nlm.nih.gov/24365039/>
- 632 30. Masters SH, Burstein R, Amofah G, Abaogye P, Kumar S, Hanlon M. Travel time to  
633 maternity care and its effect on utilization in rural Ghana: A multilevel analysis. Soc Sci  
634 Med. 2013 Sep 1;93:147–54.
- 635 31. Afaya A, Azongo TB, Dzomeku VM, Afaya RA, Salia SM, Adataro P, et al. Women’s  
636 knowledge and its associated factors regarding optimum utilisation of antenatal care in  
637 rural Ghana: A crosssectional study. PLoS One. 2020 Jul 1;15.
- 638 32. Delamater PL, Messina JP, Shortridge AM, Grady SC. Measuring geographic access to  
639 health care: raster and network-based methods. Int J Health Geogr. 2012 May 15;11.
- 640 33. Dotse-Gborgbortsi W, Dwomoh D, Alegana V, Hill A, Tatem AJ, Wright J. The influence of  
641 distance and quality on utilisation of birthing services at health facilities in Eastern  
642 Region, Ghana. BMJ Glob Heal. 2020;4:1–11.
- 643 34. Duodu PA, Bayuo J, Mensah JA, Aduse-Poku L, Arthur-Holmes F, Dzomeku VM, et al.  
644 Trends in antenatal care visits and associated factors in Ghana from 2006 to 2018. BMC  
645 Pregnancy Childbirth. 2022 Dec 1;22(1).
- 646 35. Boah M, Mahama AB, Ayamga EA. They receive antenatal care in health facilities, yet do  
647 not deliver there: Predictors of health facility delivery by women in rural Ghana. BMC  
648 Pregnancy Childbirth. 2018 May 3;18(1):1–10. Available from:  
649 [https://bmcpregnancychildbirth.biomedcentral.com/articles/10.1186/s12884-018-1749-](https://bmcpregnancychildbirth.biomedcentral.com/articles/10.1186/s12884-018-1749-6)  
650 6
- 651 36. Mkandawire P, Atari O, Kangmennaang J, Arku G, Luginaah I, Etowa J. Pregnancy

- 652 intention and gestational age at first antenatal care (ANC) visit in Rwanda. *Midwifery*.  
653 2019 Jan 1;68:30–8. Available from: <https://pubmed.ncbi.nlm.nih.gov/30343263/>
- 654 37. Rutaremwa G, Wandera SO, Jhamba T, Akiror E, Kiconco A. Determinants of maternal  
655 health services utilization in Uganda. *BMC Health Serv Res*. 2015 Jul 17;15(1):1–8.  
656 Available from: [https://bmchealthservres.biomedcentral.com/articles/10.1186/s12913-](https://bmchealthservres.biomedcentral.com/articles/10.1186/s12913-015-0943-8)  
657 [015-0943-8](https://bmchealthservres.biomedcentral.com/articles/10.1186/s12913-015-0943-8)
- 658 38. Gitonga E. Determinants of Focused Antenatal Care Uptake among Women in Tharaka  
659 Nithi County, Kenya. *Adv Public Heal*. 2017;2017:1–4.
- 660 39. Nonvignon J, Aryeetey R, Amofah G, Quansah R, Augustine Ankomah P, Aryeetey GC, et  
661 al. State of the Nation’s Health Report [Internet]. Accra, Ghana; 2018  
662 [http://ugspace.ug.edu.gh/bitstream/handle/123456789/30195/state\\_of\\_the\\_nations\\_in](http://ugspace.ug.edu.gh/bitstream/handle/123456789/30195/state_of_the_nations_interior_final.pdf?sequence=1&isAllowed=y)  
663 [terior\\_final.pdf?sequence=1&isAllowed=y](http://ugspace.ug.edu.gh/bitstream/handle/123456789/30195/state_of_the_nations_interior_final.pdf?sequence=1&isAllowed=y)
- 664 40. Kumbeni MT, Apanga PA, Yeboah EO, Kolog JT, Awuni B. The relationship between time  
665 spent during the first ANC contact, home visits and adherence to ANC contacts in Ghana.  
666 *Glob Health Action*. 2021;14(1).
- 667 41. Seidu AA, Darteh EKM, Agbaglo E, Dadzie LK, Ahinkorah BO, Ameyaw EK, et al. Barriers to  
668 accessing healthcare among women in Ghana: a multilevel modelling. *BMC Public Health*.  
669 2020;20(1):1–12. Available from:  
670 <https://bmcpublichealth.biomedcentral.com/articles/10.1186/s12889-020-10017-8>
- 671 42. Getachew T, Alemu Abajobir A, Aychiluhim M, Abajobir AA. Focused Antenatal Care  
672 Service Utilization and Associated Factors in Dejen and Aneded Districts, Northwest  
673 Ethiopia. *Prim Heal Care Open Access*. 2014;4(4):1–8. Available from:



- 674 [https://www.iomcworld.org/open-access/focused-antenatal-care-service-utilization-and-](https://www.iomcworld.org/open-access/focused-antenatal-care-service-utilization-and-associated-factors-in-dejen-and-aneded-districts-northwest-ethiopia-46154.html)  
675 [associated-factors-in-dejen-and-aneded-districts-northwest-ethiopia-46154.html](https://www.iomcworld.org/open-access/focused-antenatal-care-service-utilization-and-associated-factors-in-dejen-and-aneded-districts-northwest-ethiopia-46154.html)
- 676 43. Tarekegn SM, Lieberman LS, Giedraitis V. Determinants of maternal health service  
677 utilization in Ethiopia: Analysis of the 2011 Ethiopian Demographic and Health Survey.  
678 BMC Pregnancy Childbirth. 2014 May 7;14(1):1–13. Available from:  
679 <https://bmcpregnancychildbirth.biomedcentral.com/articles/10.1186/1471-2393-14-161>
- 680 44. Tsegay Y, Gebrehiwot T, Goicolea I, Edin K, Lemma H, Sebastian MS. Determinants of  
681 antenatal and delivery care utilization in Tigray region, Ethiopia: A cross-sectional study.  
682 Int J Equity Health. 2013;12(1). <http://www.equityhealthj.com/content/12/1/30>
- 683 45. Kotoh AM, Boah M. “No visible signs of pregnancy, no sickness, no antenatal care”:  
684 Initiation of antenatal care in a rural district in Northern Ghana. BMC Public Health.  
685 2019;19(1). Available from: <https://doi.org/10.1186/s12889-019-7400-2>
- 686 46. Manyeh AK, Akpakli DE, Kukula V, Ekey RA, Narh-Bana S, Adjei A, et al. Socio-  
687 demographic determinants of skilled birth attendant at delivery in rural southern Ghana.  
688 BMC Res Notes. 2017 Jul 11;10(1):1–7. Available from:  
689 <https://bmresnotes.biomedcentral.com/articles/10.1186/s13104-017-2591-z>
- 690 47. Gebregziabher NK, Zeray AY, Abtew YT, Kinfu TD, Abrha DT. Factors determining choice  
691 of place of delivery: Analytical cross-sectional study of mothers in Akordet town, Eritrea.  
692 BMC Public Health. 2019 Jul 10;19(1):1–11. Available from:  
693 <https://bmcpublichealth.biomedcentral.com/articles/10.1186/s12889-019-7253-8>
- 694 48. Sakeah E, Doctor H V., McCloskey L, Bernstein J, Yeboah-Antwi K, Mills S. Using the  
695 community-based health planning and services program to promote skilled delivery in

- 696 rural Ghana: Socio-demographic factors that influence women utilization of skilled  
697 attendants at birth in Northern Ghana. BMC Public Health. 2014;14(1):1–9.
- 698 49. Maung TM, Show KL, Mon NO, Tunçalp Ö, Aye NS, Soe YY, et al. A qualitative study on  
699 acceptability of the mistreatment of women during childbirth in Myanmar. Reprod  
700 Health. 2020;17(1). Available from: <https://doi.org/10.1186/s12978-020-0907-2>
- 701 50. Bohren MA, Vogel JP, Hunter EC, Lutsiv O, Makh SK, Souza JP, et al. The Mistreatment of  
702 Women during Childbirth in Health Facilities Globally: A Mixed-Methods Systematic  
703 Review. PLoS Med. 2015;12(6).
- 704 51. Tolefac PN, Halle-Ekane GE, Agbor VN, Sama CB, Ngwasiri C, Tebeu PM. Why do pregnant  
705 women present late for their first antenatal care consultation in Cameroon? Matern Heal  
706 Neonatol Perinatol 2017 31. 2017 Dec 13;3(1):1–6. Available from:  
707 <https://mhnpjournal.biomedcentral.com/articles/10.1186/s40748-017-0067-8>
- 708 52. Appiah F. Individual and community-level factors associated with early initiation of  
709 antenatal care: Multilevel modelling of 2018 Cameroon Demographic and Health Survey.  
710 PLoS One. 2022 Apr 1;17(4):e0266594. Available from:  
711 <https://journals.plos.org/plosone/article?id=10.1371/journal.pone.0266594>
- 712 53. Tola W, Negash E, Sileshi T, Wakgari N. Late initiation of antenatal care and associated  
713 factors among pregnant women attending antenatal clinic of Ilu Ababor Zone, southwest  
714 Ethiopia: A cross-sectional study. PLoS One. 2021;16(1 January). Available from:  
715 [https://aditum.org/journals/international-journal-of-epidemiology-and-public-health-](https://aditum.org/journals/international-journal-of-epidemiology-and-public-health-research/archive/187)  
716 [research/archive/187](https://aditum.org/journals/international-journal-of-epidemiology-and-public-health-research/archive/187)
- 717 54. Chen L, Afolaranmi TO, Calibo AP, Danusa KT, Debelo BT. Level of Late Initiation of

- 718 Antenatal Care Visit and Associated Factors Amongst Antenatal Care Attendant Mothers  
719 in Gedo General Hospital, West Shoa Zone, Oromia Region, Ethiopia. *Front Public Heal* |  
720 [www.frontiersin.org](http://www.frontiersin.org). 2022;1:866030. Available from: [www.frontiersin.org](http://www.frontiersin.org)
- 721 55. Tekelab T, Berhanu B. Factors Associated with Late Initiation of Antenatal Care among  
722 Pregnant Women Attending Antenatal Clinic at Public Health Centers in Kembata  
723 Tembaro Zone, Southern Ethiopia. *Sci Technol Arts Res J*. 2014;3(1):108–15. Available  
724 from: <https://www.ajol.info/index.php/star/article/view/104051>
- 725 56. Yaya S, Zegeye B, Ahinkorah BO, Seidu AA, Ameyaw EK, Adjei NK, et al. Predictors of  
726 skilled birth attendance among married women in Cameroon: further analysis of 2018  
727 Cameroon Demographic and Health Survey. *Reprod Health*. 2021 Dec 1;18(1):1–12.  
728 Available from: [https://reproductive-health-](https://reproductive-health-journal.biomedcentral.com/articles/10.1186/s12978-021-01124-9)  
729 [journal.biomedcentral.com/articles/10.1186/s12978-021-01124-9](https://reproductive-health-journal.biomedcentral.com/articles/10.1186/s12978-021-01124-9)
- 730 57. Verney A, Reed BA, Lumumba JB, Kung'u JK. Factors associated with socio-demographic  
731 characteristics and antenatal care and iron supplement use in Ethiopia, Kenya, and  
732 Senegal. *Matern Child Nutr*. 2018 Feb 1;14:e12565. Available from:  
733 <https://onlinelibrary.wiley.com/doi/full/10.1111/mcn.12565>
- 734 58. Jiwani SS, Amouzou A, Carvajal-Aguirre L, Chou D, Keita Y, Moran AC, et al. Timing and  
735 number of antenatal care contacts in low and middle-income countries: Analysis in the  
736 Countdown to 2030 priority countries. *J Glob Health*. 2020 Jun 1;10(1). Available from:  
737 [/pmc/articles/PMC7101027/](https://pubmed.ncbi.nlm.nih.gov/37101027/)
- 738 59. World Health Organization. Trends in Maternal Mortality 2000 to 2017 [Internet]. *Sexual*  
739 *and Reproductive Health*. 2019. 12 p. Available from: <http://apps.who.int/bookorders>.

- 740 60. Gyimah SO, Takyi BK, Addai I. Challenges to the reproductive-health needs of African  
741 women: on religion and maternal health utilization in Ghana. Soc Sci Med. 2006  
742 Jun;62(12):2930–44. Available from: <https://pubmed.ncbi.nlm.nih.gov/16406206/>
- 743 61. Alatinga KA, Affah J, Abihiro GA. Why do women attend antenatal care but give birth at  
744 home? a qualitative study in a rural Ghanaian District. PLoS One. 2021 Dec 1;16(12  
745 December):e0261316. Available from:  
746 <https://journals.plos.org/plosone/article?id=10.1371/journal.pone.0261316>
- 747 62. Ahmed S, Creanga AA, Gillespie DG, Tsui AO. Economic Status, Education and  
748 Empowerment: Implications for Maternal Health Service Utilization in Developing  
749 Countries. PLoS One. 2010;5(6):e11190. Available from:  
750 <https://journals.plos.org/plosone/article?id=10.1371/journal.pone.0011190>
- 751 63. Gebresilassie B, Belete T, Tilahun W, Berhane B, Gebresilassie S. Timing of first antenatal  
752 care attendance and associated factors among pregnant women in public health  
753 institutions of Axum town, Tigray, Ethiopia, 2017: A mixed design study. BMC Pregnancy  
754 Childbirth. 2019 Sep 18;19(1):1–11. Available from:  
755 [https://bmcpregnancychildbirth.biomedcentral.com/articles/10.1186/s12884-019-2490-](https://bmcpregnancychildbirth.biomedcentral.com/articles/10.1186/s12884-019-2490-5)  
756 5
- 757 64. Chan AE, Ayetey J, Alirigia RA, Sabogu Z. Community Mobilization and Home Visits: Key  
758 Pillars of the Community-Based Health Planning and Services ( CHPS ) Program in Ghana.  
759 2015;1–10.
- 760 65. Cockcroft A, Omer K, Gidado Y, Chadi Baba M, Aziz A, Ansari U, et al. The impact of  
761 universal home visits with pregnant women and their spouses on maternal outcomes: a

- 762 cluster randomised controlled trial in Bauchi State, Nigeria Handling editor Seye  
763 Abimbola. *BMJ Glob Heal*. 2019;4:1172. Available from: <http://gh.bmj.com/>
- 764 66. Ejeta E, Dabsu R, Zewdie O, Merdassa E. Factors determining late antenatal care booking  
765 and the content of care among pregnant mother attending antenatal care services in  
766 east wollega administrative zone, west Ethiopia. *Pan Afr Med J*. 2017;27. Available from:  
767 <http://www.panafrican-med-journal.com/content/article/27/184/full/>
- 768 67. Gebremeskel F, Dibaba Y, Admassu B. Timing of First Antenatal Care Attendance and  
769 Associated Factors among Pregnant Women in Arba Minch Town and Arba Minch District,  
770 Gamo Gofa Zone, South Ethiopia. *J Environ Public Health*. 2015;2015. Available from:  
771 <http://dx.doi.org/10.1155/2015/971506>
- 772 68. Fullman N, Yearwood J, Abay SM, Abbafati C, Abd-Allah F, Abdela J, et al. Measuring  
773 performance on the Healthcare Access and Quality Index for 195 countries and  
774 territories and selected subnational locations: A systematic analysis from the Global  
775 Burden of Disease Study 2016. *Lancet*. 2018 Jun 2;391(10136):2236–71.
- 776 69. Kisuule I, Kaye DK, Najjuka F, Ssematimba SK, Arinda A, Nakitende G, et al. Timing and  
777 reasons for coming late for the first antenatal care visit by pregnant women at Mulago  
778 hospital, Kampala Uganda. *BMC Pregnancy Childbirth*. 2013;13. Available from:  
779 <http://www.biomedcentral.com/1471-2393/13/121>
- 780 70. Hijazi HH, Alyahya MS, Sindiani AM, Saqan RS, Okour AM. Determinants of antenatal care  
781 attendance among women residing in highly disadvantaged communities in northern  
782 Jordan: A cross-sectional study. *Reprod Health*. 2018 Jun 7;15(1):1–18. Available from:  
783 <https://reproductive-health-journal.biomedcentral.com/articles/10.1186/s12978-018->

784 0542-3

785

786

787

788

789

790

791

792

793

794

795

796

797

798

799

800

801

## Abbreviations

802 ANC: Antenatal Care

803 CHN/O: Community Health Nurse/Officer

804 CHPS: Community-based Health Planning and Services

805 GHc: Ghana cedis

- 806 GHS: Ghana Health Service
- 807 GPS: Global Positioning System
- 808 MoH: Ministry of Health
- 809 PHC: Primary Health Care
- 810 RMNCH: Reproductive, Maternal, Newborn, and Child Health
- 811 SSA: Sub-Saharan Africa
- 812 THLD: Twifo Hemang Lower Denkyira
- 813 USD: United States of America Dollars
- 814 VIF: Variance Inflation Factor
- 815 WHO: World Health Organization

816

817 **Consent For Publication**

818 Not applicable

819

820 **Availability of data and materials**

821 The datasets collected, generated, and/or analyzed during the present study are available from  
822 the corresponding author upon reasonable request.

823

824 **Competing interests**

825 The authors declared that they have no competing interests

826

827

828

## **Funding**

829 This study was supported by The Project for Human Resource Development Scholarship, Japan  
830 International Cooperation Agency (JICA), and Nagasaki University School of Tropical Medicine  
831 and Global Health, Japan.

832

833

834

## **Authors' contributions**

835 JH, SAG, DBD, and TA designed and conceptualized the study. JH, SAG, and DBD carried out the  
836 data collection as GKS, HA, and TA played supervisory roles. JH, SAG, GKS, HA, and TA  
837 performed the data analysis and interpretation. JH, SAG, and DBD drafted the initial  
838 manuscript. All authors reviewed and approved the final manuscript.

839

840

841

## **Authors' acronyms**

842 John Hammond (JH); Silas Adjei-Gyamfi (SAG); Doreen Brew Daniels (DBD); Godfred Kwabena  
843 Sarpong (GKS); Hirotsugu Aiga (HA); Tsunenori Aoki (TA)

844

845

## **Supporting information**

846 S1 Figure 1. Map of the THLD district showing communities and measured distance to all CHPS  
847 zones

848 S1 Table 1. Description of key variables



- 849 S2 Table 2. Sociodemographic characteristics of respondents
- 850 S3 Table 3. Socioeconomic and antenatal characteristics of respondents
- 851 S4 Table 4. Distance and location of CHPS zone characteristics
- 852 S5 Table 5. Logistic regression on associated factors for antenatal accessibility
- 853

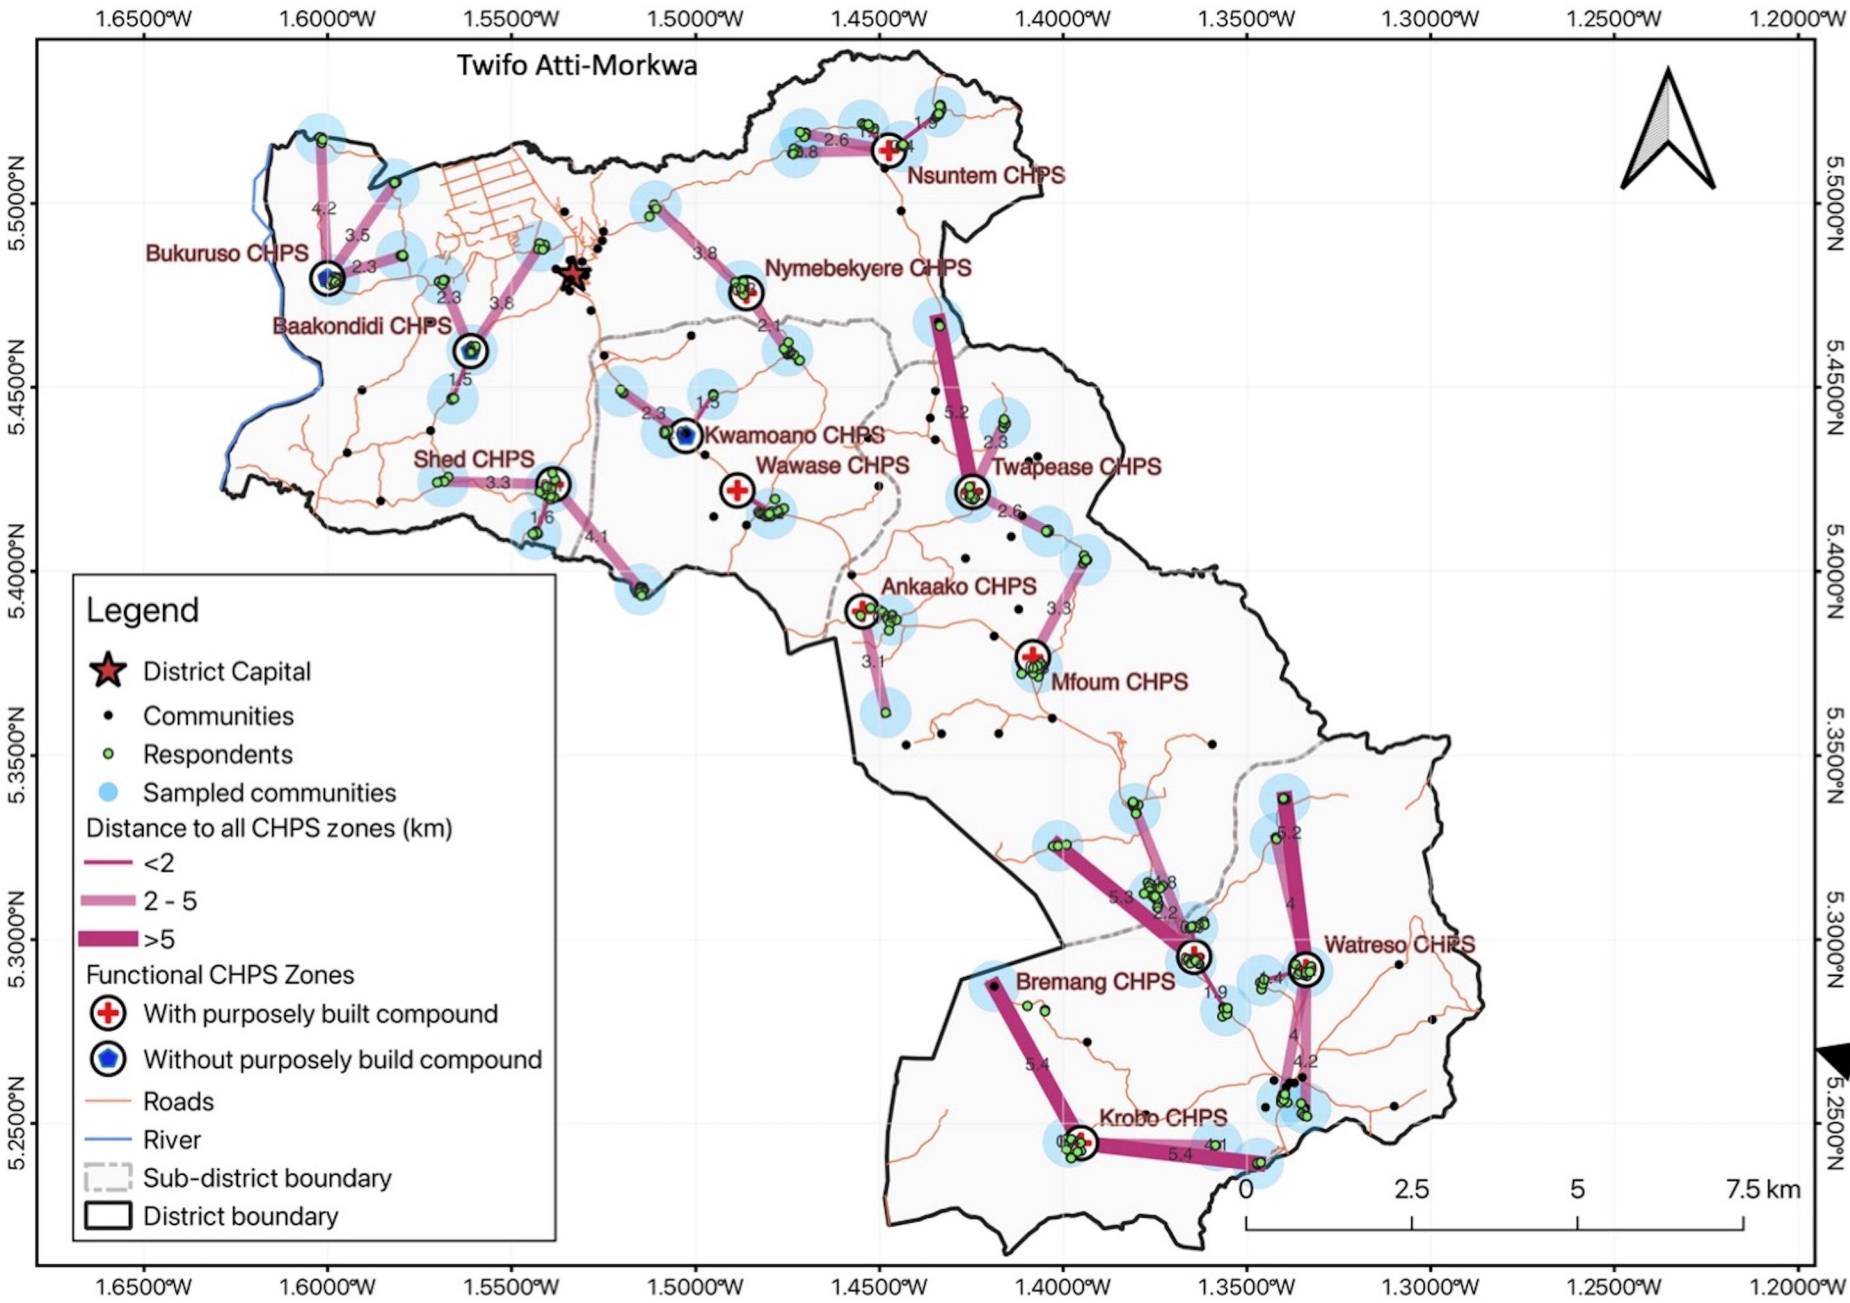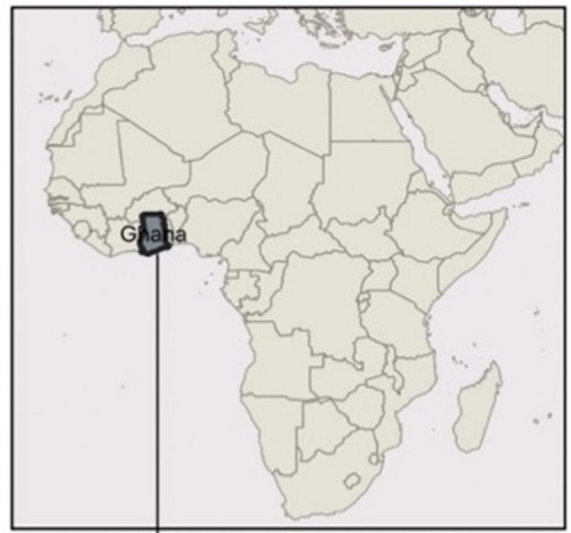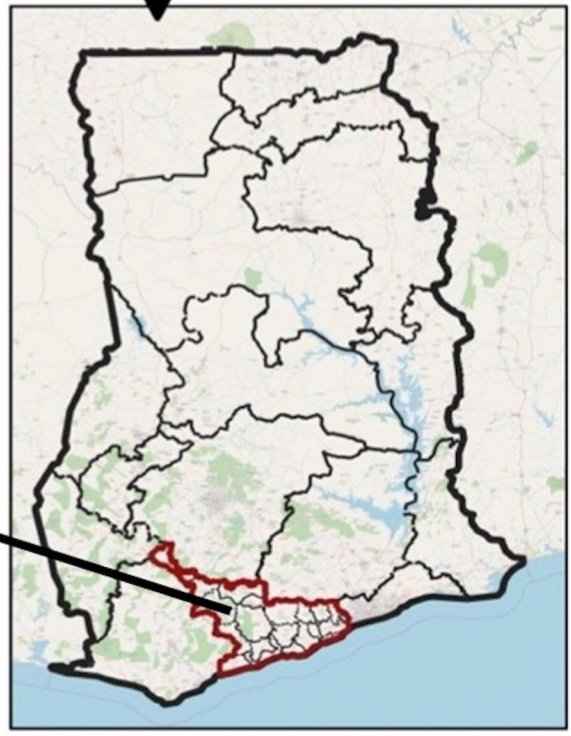

Source: https://www.medrxiv.org/content/10.1101/2024.05.09.24307150v1.full.pdf
